# Supplementary material
Source: publisher figshare collection journal article supplement (https://sage.figshare.com/ndownloader/files/15433349)

## Supplementary material

### Search strategy

#### *Medline via Pubmed*

("peripherally inserted central catheter" OR "peripherally inserted central catheters" OR "peripherally inserted central venous catheter" OR "peripherally inserted central venous catheters" OR PICC OR PICCs OR "central venous access" OR "Catheterization, Peripheral"[Mesh] OR "Catheterization, Central Venous"[Mesh]) AND (thrombosis OR thrombotic OR thromb\* OR "Venous Thromboembolism"[Mesh]) AND ( ("2010/01/01"[PDat] : "2018/12/31"[PDat] ) AND adult[MeSH])

#### *Cochrane*

("peripherally inserted central catheter" OR "peripherally inserted central catheters" OR "peripherally inserted central venous catheter" OR "peripherally inserted central venous catheters" OR PICC OR PICCs OR "central venous access") AND (thrombosis OR thrombotic OR thromb\*)

#### *Embase*

("peripherally inserted central catheter" OR "peripherally inserted central catheters" OR "peripherally inserted central venous catheter" OR "peripherally inserted central venous catheters" OR PICC OR PICCs OR "central venous access") AND (thrombosis OR thrombotic OR thromb\*)

## Supplementary methods

### Details and operationalization of the risk of bias assessment

We found no established tool to assess the risk of bias of non-comparative studies investigating the occurrence of rare adverse events. We followed the methodology developed by Mantarro and colleagues to conduct a meta-analysis of the risk of cardiotoxicity after trastuzumab treatment for breast cancer.<sup>1</sup> Each study was eligible for a maximum of two stars per evaluation criterion, up to a total of eight stars. Studies assigned 6-8 points were considered as high quality, 4-5 as medium quality, and 1-3 as low quality. We assessed the risk of bias in the included studies according to the following key domains (table 1).

#### *Lack of generalizability bias*

We assessed the lack of generalizability bias based on the inclusion or exclusion of patients who met the indication for PICC insertion and that were likely representative of a large spectrum of patients, including those at high and low risk of developing deep vein thrombosis. Two variables were considered: oncologic diagnosis and anticoagulant therapy at the time of PICC insertion. We decided to assign two stars to studies on mixed samples including mostly oncologic patients that did not exclude patients on anticoagulant therapy at the moment of PICC insertion. We decided *a priori* to downgrade randomized controlled trials (RCTs) for lack of generalizability.

#### *Detection bias*

We judged a mean period of observation of at least 1 month after PICC insertion for a total of 6 months as optimal (two stars) to assess detection bias; at least two weeks for a total observation period of 1 month as intermediate (1 star); and less than two weeks as poor (zero stars). We assigned no stars to studies not reporting such data.

#### *Attrition bias*

The assessment of attrition bias was based on the rate of loss to follow-up: we assigned two stars if the proportion of withdrawals was less than 1%; one star if it was greater than or equal to 1%, but less than 3%; and no stars if the rate was greater than or equal to 3%. Because VTE is a rare event, we required that the cause of loss to follow-up was reported and that patients lost to follow-up did not differ from those observed. We assigned one or no stars to studies with a moderate or severe imbalance in patient characteristics concerning loss to follow-up and no stars to studies not reporting such data.

#### *Reporting bias*

Our assessment of reporting bias focused on outcome diagnosis modality. Accordingly, two stars were assigned to studies where PICC-related deep vein thrombosis was diagnosed by means of Doppler ultrasonography and where diagnostic criteria included the presence of intraluminal thrombus combined with a lack of vein compression and/or with an abnormal flow pattern in the segment of the vein distal to the thrombosis, as previously described.<sup>2</sup> One star was assigned to studies where PICC-related deep vein thrombosis was diagnosed by means of Doppler ultrasonography, but no diagnostic criteria were reported. No stars were assigned to studies which did not specify deep vein thrombosis detection modality.

## References

1. Mantarro S, Rossi M, Bonifazi M et al. Risk of severe cardiotoxicity following treatment with trastuzumab: a meta-analysis of randomized and cohort studies of 29,000 women with breast cancer. *Intern Emerg Med* 2016; **11**: 123-40.
2. Chin EE, Zimmerman PT, Grant EG. Sonographic evaluation of upper extremity deep venous thrombosis. *J Ultrasound Med* 2005; **24**:829-840
3. Cotogni P, Barbero C, Garrino C et al. Peripherally inserted central catheters in non-hospitalized cancer patients: 5-year results of a prospective study. *Support Care Cancer* 2015 ; **23**: 403-9.
4. Evans RS, Sharp JH, Linford LH et al. Reduction of peripherally inserted central catheter-associated DVT. *Chest* 2013; **143**: 627-633.
5. Bellesi S, Chiusolo P, De Pascale G et al. Peripherally inserted central catheters (PICCs) in the management of oncohematological patients submitted to autologous stem cell transplantation. *Support Care Cancer* 2013; **21**: 531-5.
6. Bertoglio S, Faccini B, Lalli L, Cafiero F, Bruzzi P. Peripherally inserted central catheters (PICCs) in cancer patients under chemotherapy: A prospective study on the incidence of complications and overall failures. *J Surg Oncol* 2016; **113**: 708-14.
7. Cornillon J, Martignoles JA, Tavernier-Tardy E et al. Prospective evaluation of systematic use of peripherally inserted central catheters (PICC lines) for the home care after allogeneic hematopoietic stem cells transplantation. *Support Care Cancer* 2017; **25**: 2843-7.
8. DeLemos C, Abi-Nader J, Akins PT. Use of peripherally inserted central catheters as an alternative to central catheters in neurocritical care units. *Crit Care Nurse* 2011; **31**: 70-5.
9. Dupont C, Gouya H, Panzo R et al. Complications of peripherally inserted central catheters in adults with cystic fibrosis or bronchiectasis. *J Vasc Access* 2015; **16**: 245-9.
10. Evans RS, Sharp JH, Linford LH et al. Risk of symptomatic DVT associated with peripherally inserted central catheters. *Chest* 2010; **138**: 803-10.
11. Kang J, Chen W, Sun W et al. Peripherally inserted central catheter-related complications in cancer patients: a prospective study of over 50,000 catheter days. *J Vasc Access* 2017; **18**: 153-157.
12. Mermis JD, Strom JC, Greenwood JP et al. Quality improvement initiative to reduce deep vein thrombosis associated with peripherally inserted central catheters in adults with cystic fibrosis. *Ann Am Thorac Soc* 2014; **11**: 1404-10.

13. Pittiruti M, Emoli A, Porta P, Marche B, DeAngelis R, Scoppettuolo G. A prospective, randomized comparison of three different types of valved and non-valved peripherally inserted central catheters. *J Vasc Access* 2014; **15**: 519-23.
14. Sharp R, Cummings M, Fielder A, Mikocka-Walus A. The catheter to vein ratio and rates of symptomatic venous thromboembolism in patients with a peripherally inserted central catheter (PICC): a prospective cohort study. *Int J Nurs Stud* 2015; **52**: 677-85.
15. Tian G, Zhu Y, Qi L, Guo F, Xu H. Efficacy of multifaceted interventions in reducing complications of peripherally inserted central catheter in adult oncology patients. *Support Care Cancer* 2010; **18**: 1293-8.
16. Zerla PA, Canelli A, Cerne L et al. Evaluating safety, efficacy, and cost-effectiveness of PICC securement by subcutaneously anchored stabilization device. *J Vasc Access* 2017; **18**: 238-42.
17. Liu K, Zhou Y, Xie W et al. Handgrip exercise reduces peripherally-inserted central catheter-related venous thrombosis in patients with solid cancers: A randomized controlled trial. *Int J Nurs Stud* 2018; **86**: 99-106.

**Table 15. Quality assessment of included studies.**

| Study First Author            | Year | Selection Bias | Attrition Bias | Detection Bias | Reporting Bias | Total |
|-------------------------------|------|----------------|----------------|----------------|----------------|-------|
| Bellesi et al <sup>5</sup>    | 2013 | *              | NA             | *              | *              | 4     |
| Bertoglio et al <sup>6</sup>  | 2016 | **             | -              | **             | **             | 6     |
| Cornillon et al <sup>7</sup>  | 2017 | *              | NA             | **             | *              | 4     |
| Cotogni et al <sup>3</sup>    | 2015 | **             | NA             | **             | *              | 5     |
| DeLemos et al <sup>8</sup>    | 2011 | *              | NA             | *              | -              | 2     |
| Dupont et al <sup>9</sup>     | 2015 | *              | NA             | *              | *              | 3     |
| Evans et al <sup>10</sup>     | 2010 | *              | NA             | -              | **             | 3     |
| Evans et al <sup>4</sup>      | 2013 | *              | NA             | -              | **             | 3     |
| Kang et al <sup>11</sup>      | 2017 | **             | NA             | **             | *              | 5     |
| Mermis et al <sup>12</sup>    | 2014 | *              | NA             | *              | *              | 3     |
| Pittiruti et al <sup>13</sup> | 2014 | *              | NA             | **             | *              | 4     |
| Sharp et al <sup>14</sup>     | 2015 | *              | -              | **             | *              | 4     |
| Tian et al <sup>15</sup>      | 2010 | **             | NA             | **             | *              | 5     |
| Zerla et al <sup>16</sup>     | 2017 | *              | NA             | **             | -              | 3     |
| Liu et al <sup>17</sup>       | 2018 | *              | -              | *              | **             | 4     |

\*\* , high quality; \* , intermediate quality; – , low quality; NA, not assessable

**Figure 1S. Forest plot showing weighted frequencies of PICC-related deep vein thrombosis rate.**

Random effect meta-analysis for PICC-related deep vein thrombosis rate and subgroup stratification by tip location ascertainment.

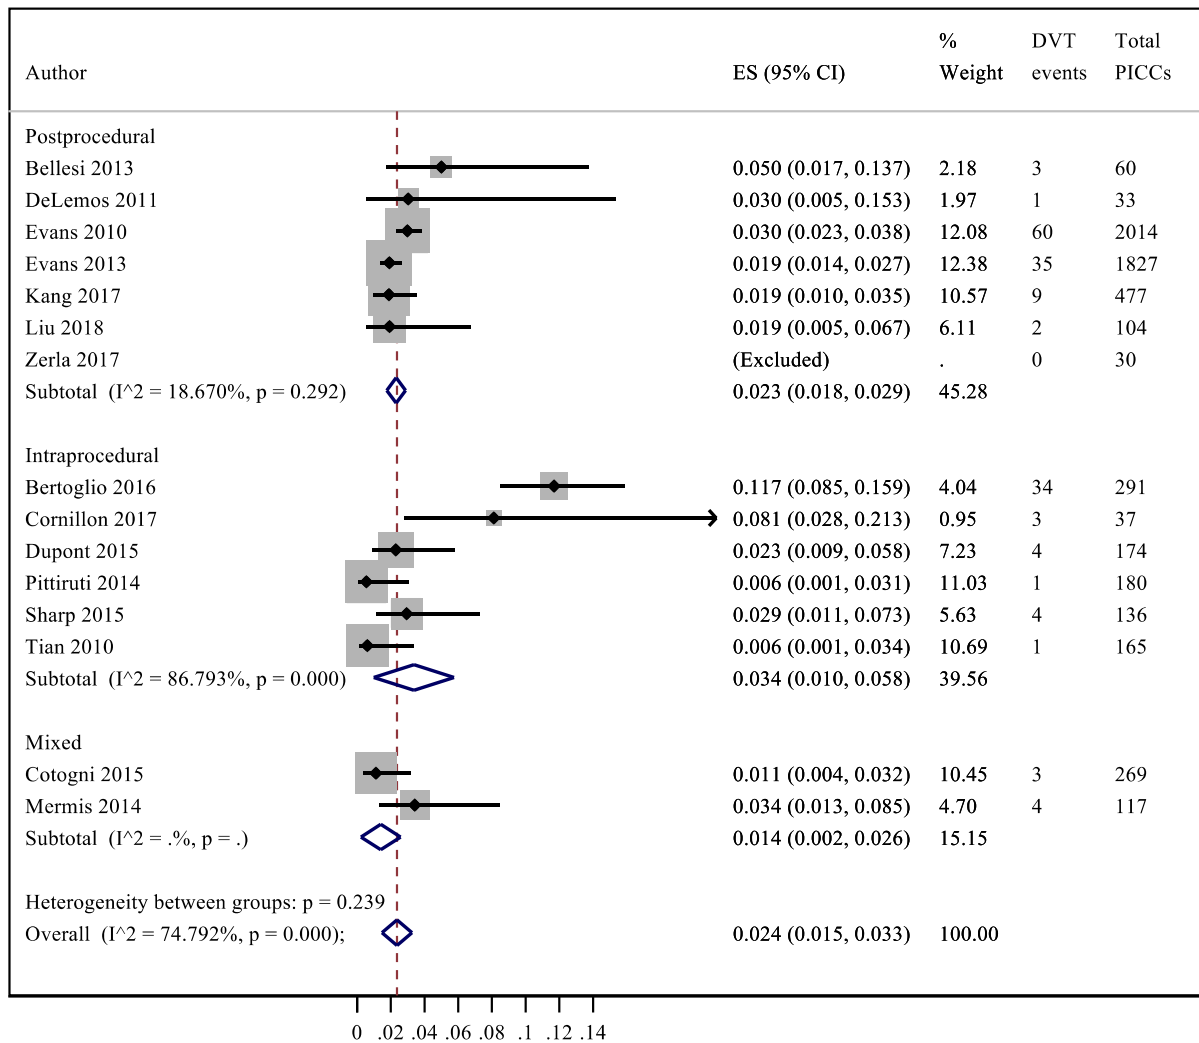

**Figure 2S. Forest plot showing weighted frequencies of PICC-related deep vein thrombosis rate.**

Random effect meta-analysis for PICC-related deep vein thrombosis rate and subgroup stratification by patient setting.

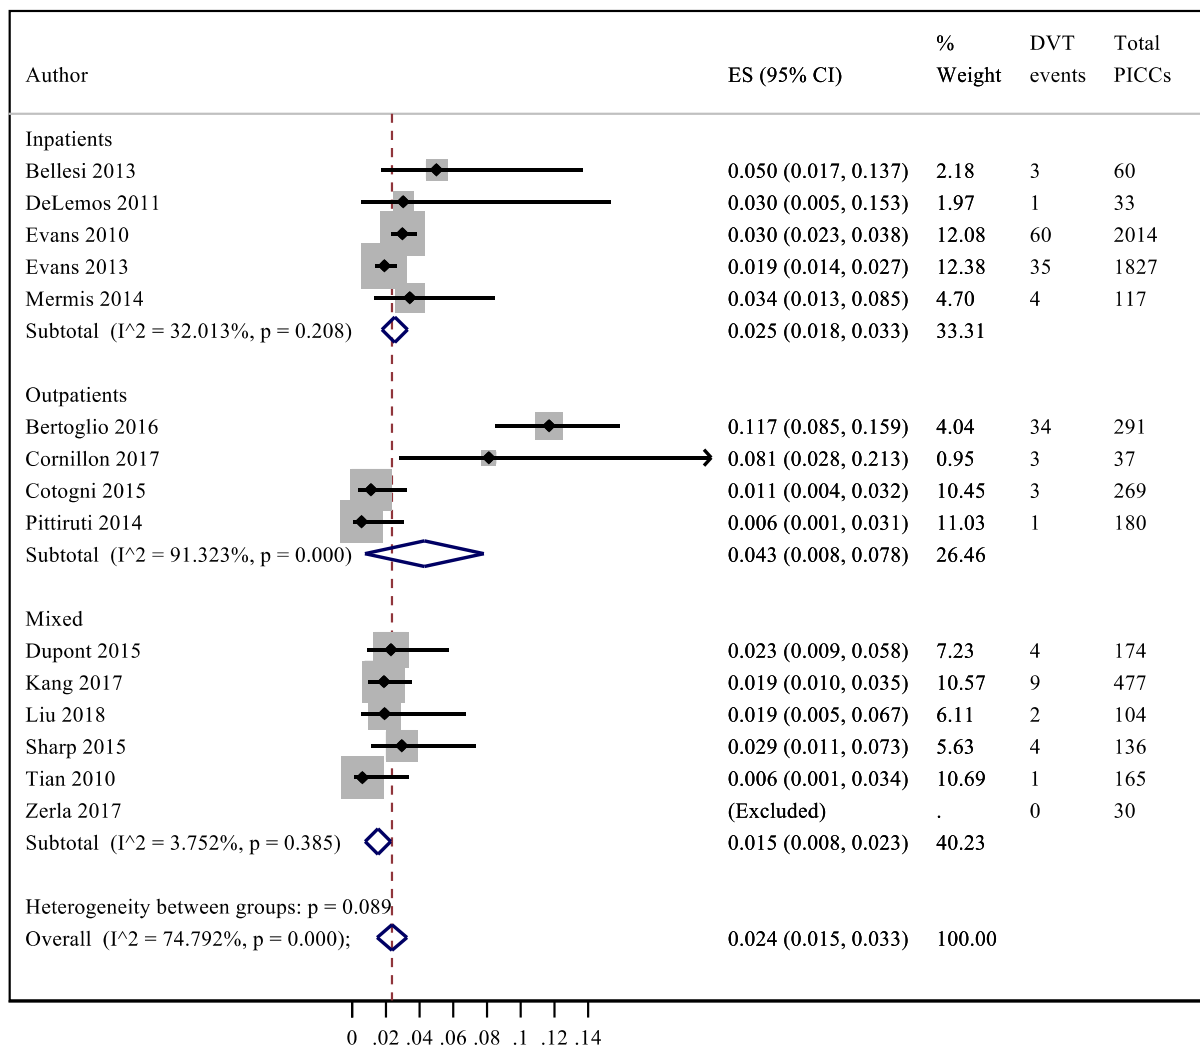

**Figure 3S. Forest plot showing weighted frequencies of PICC-related deep vein thrombosis rate after leave-one-out analysis and the exclusion of the study by Bertoglio and colleagues<sup>6</sup>.**  
Random effect meta-analysis for PICC-related deep vein thrombosis rate and subgroup stratification by diagnosis.

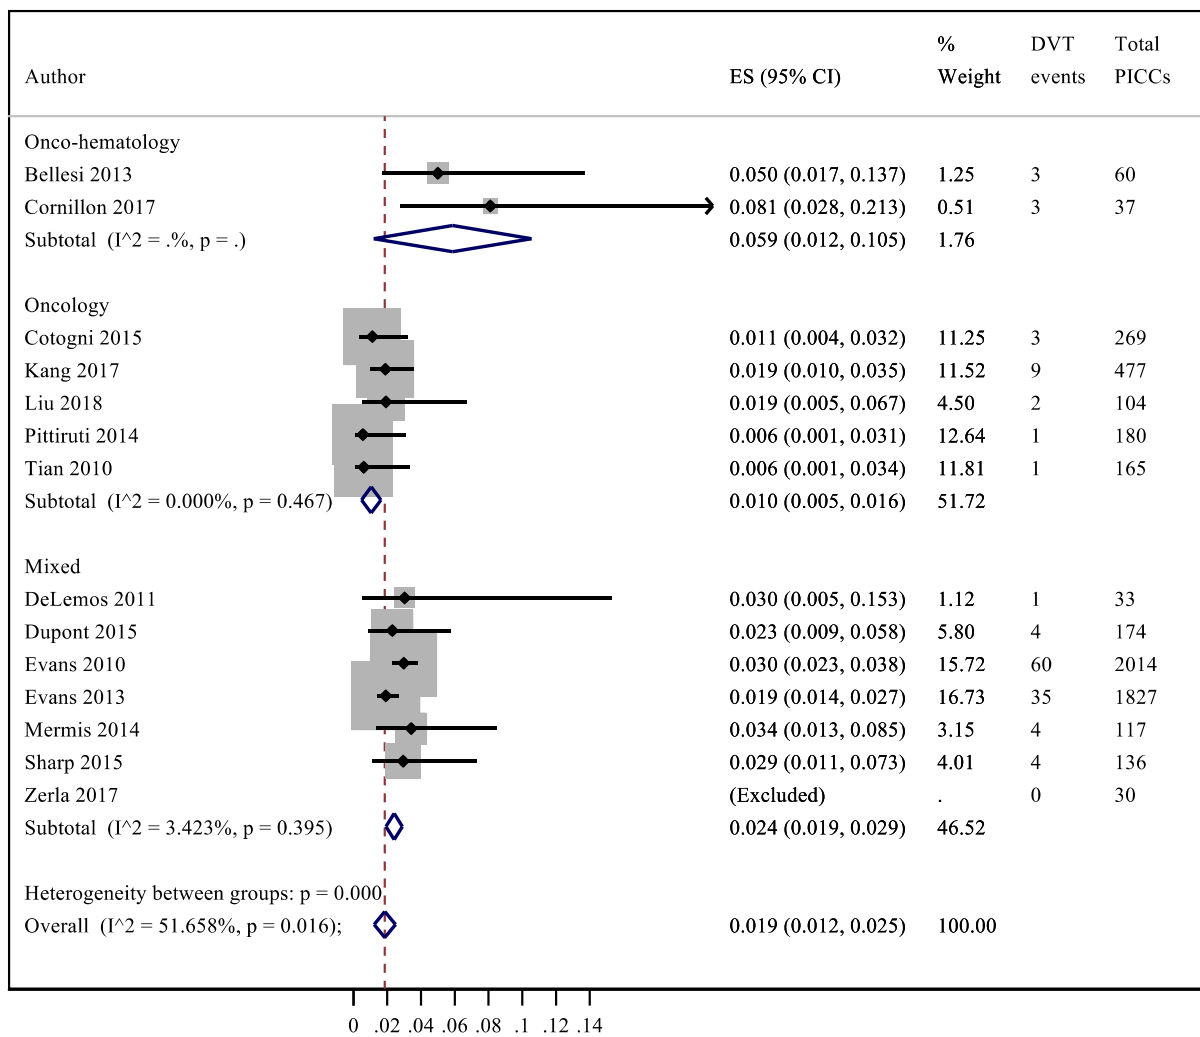

Supplement: Supplementary file 1 [file 15433349]
